# Supplementary material for: Genome-scale chromatin binding dynamics of RNA Polymerase II general transcription machinery components
Source: PubMed Central journal article supplement (PMC11066129; doi:10.1038/s44318-024-00089-2), 2024-04-02
Supplement: 44318_2024_89_MOESM1_ESM.pdf [file 44318_2024_89_MOESM1_ESM.pdf]

## Appendix

### Genome-scale chromatin binding dynamics of RNA Polymerase II general transcription machinery components

Kristyna Kupkova, Savera J. Shetty, Elizabeth A. Hoffman, Stefan Bekiranov, and David T. Auble✉

✉ Correspondence: [auble@virginia.edu](mailto:auble@virginia.edu).

#### TABLE OF CONTENTS

|                                                                                                                                            |    |
|--------------------------------------------------------------------------------------------------------------------------------------------|----|
| <i>Supplementary figures</i> .....                                                                                                         | 2  |
| <b>Appendix Figure S1- Competition ChIP</b> .....                                                                                          | 2  |
| <b>Appendix Figure S2 - Residence time PCA</b> . ....                                                                                      | 3  |
| <b>Appendix Figure S3 – Example ChIP signal tracks</b> .....                                                                               | 4  |
| <b>Appendix Figure S4 - Heatmap clusters enrichment</b> .....                                                                              | 5  |
| <b>Appendix Figure S5 - Comparison of residence times between genes with or without a consensus TATA element in their promoters</b> . .... | 6  |
| <b>Appendix Figure S6 - Comparison of residence times between GAL genes and others</b> . ....                                              | 7  |
| <b>Appendix Figure S7 - Functional enrichment of long-lived and short-lived TFIIIF sites</b> .....                                         | 8  |
| <b>Appendix Figure S8 - Comparison to Rap1 residence times and comparison of TBP and TFIIIE residence times to others</b> .....            | 10 |
| <b>Appendix Figure S9 - Growth of competition ChIP strains</b> . ....                                                                      | 11 |
| <i>Supplementary tables</i> .....                                                                                                          | 12 |
| <b>Appendix Table S1 - Quantified Western blots: HA/Myc ratios normalized to 0-1</b> .....                                                 | 12 |
| <b>Appendix Table S2 - List of primers</b> .....                                                                                           | 13 |
| <b>Appendix Table S3 - Hill model fits to HA/Myc Western blot data for turnover model</b> .....                                            | 14 |
| <b>Appendix Table S4 - Accurate initial estimates of residence times for turnover model fits</b> .....                                     | 14 |
| <i>Supplementary references</i> .....                                                                                                      | 15 |

**SUPPLEMENTARY FIGURES**

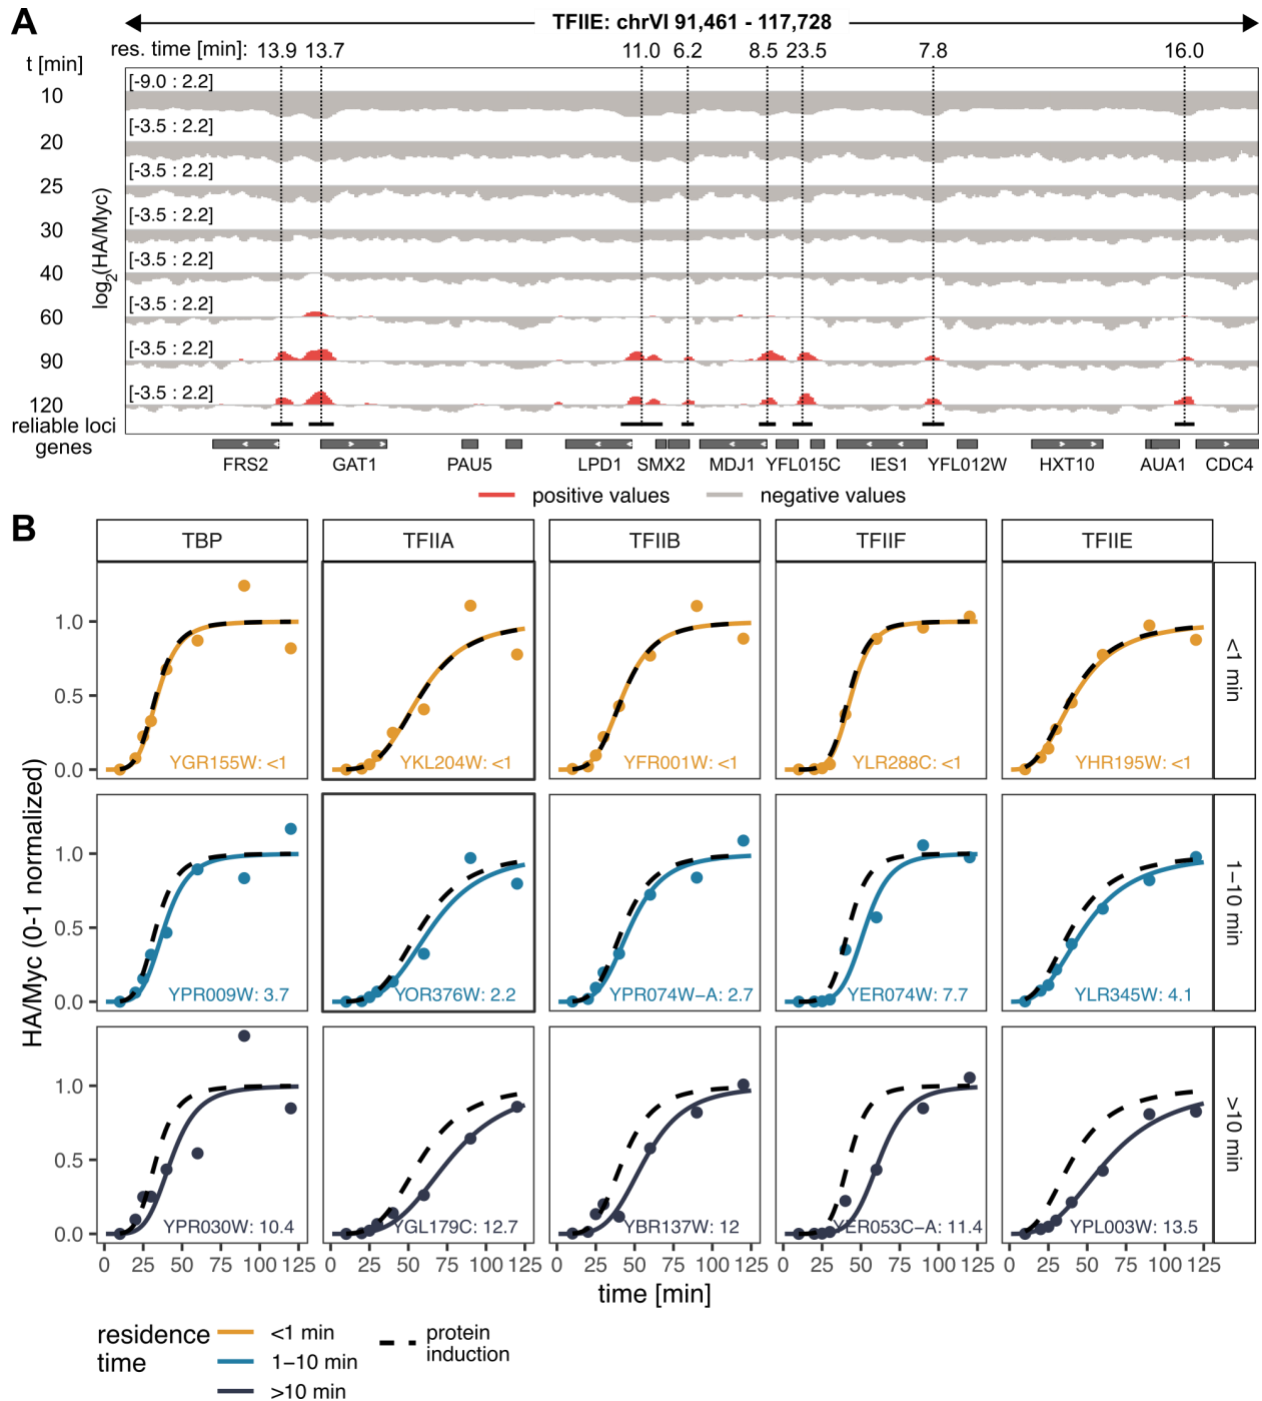

**Appendix Figure S1- Competition ChIP.**

A Genome browser view showing  $\log_2$  transformed ratios of normalized HA and Myc ChIP signals over time.

B Examples of fitted ChIP-seq data for fast (<1 min), moderate (1-10 min) and slow sites (>10 min) for all GTFs examined in this study. Corresponding gene targets are indicated in the bottom right corner of each panel along with the estimated residence times in minutes. The plots show the normalized measurements of HA and Myc ChIP signal ratios fitted with colored curves; the dashed black curves show the induction rate for a given competitor.

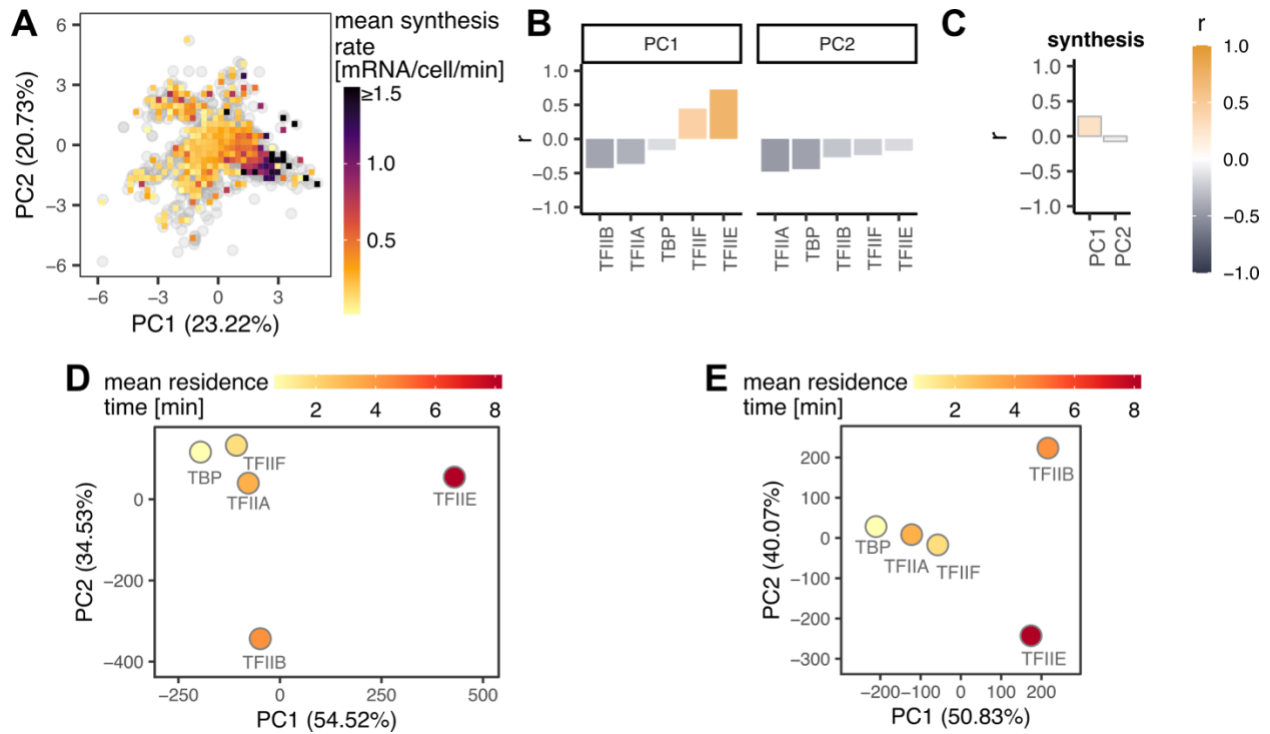

**Appendix Figure S2 - Residence time PCA.**

A PCA plot separating genes (points) based on GTF residence times. Color coding indicates the mean synthesis rate of the genes falling under a given area. Note that in comparison to Fig 3E, in this figure genes with residence time estimates <1 min were excluded from the analysis.

B Person's correlation coefficients (y-axis) between PCs from (A) and residence times of a given GTF (x-axis).

C Pearson's correlation coefficients (y-axis) between PCs (x-axis) from (A) and synthesis rates.

D PCA plot separating individual GTFs (points) based on their residence times.

E Similar to (D), however, sites with residence time estimates <1 min were excluded from the analysis.

Data information: In (A,D,E) the percentages in the axis labels indicate percentage of variance explained by a given PC.

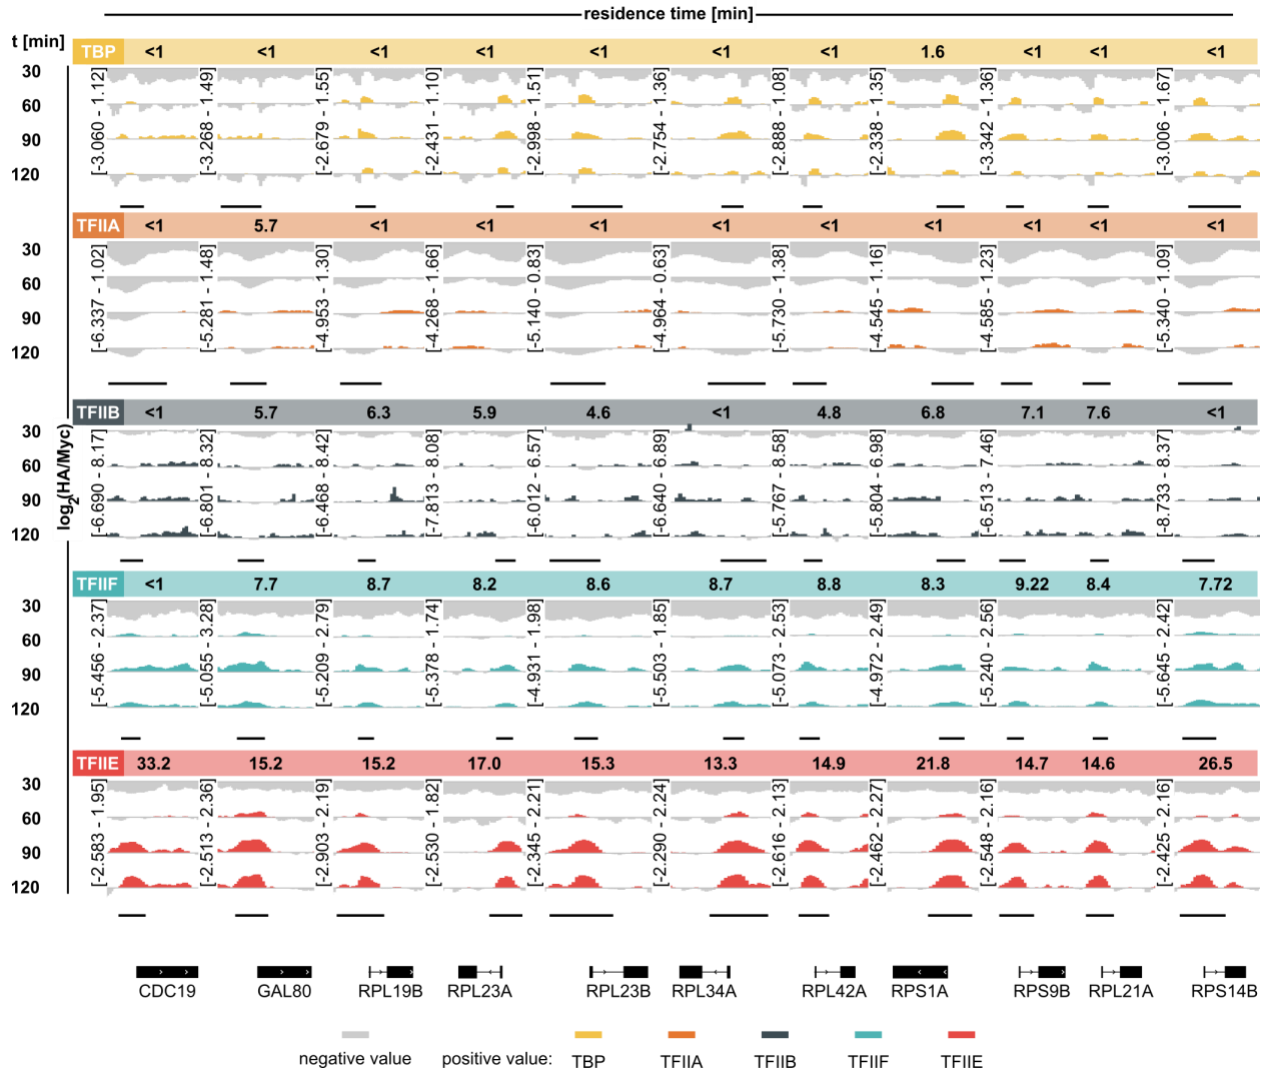

**Appendix Figure S3 – Example ChIP signal tracks.**

Genome browser views showing log<sub>2</sub> transformed ratios of normalized HA and Myc ChIP signals over time for all GTFs. Shown are example genes from cluster 1 (Fig 4A).

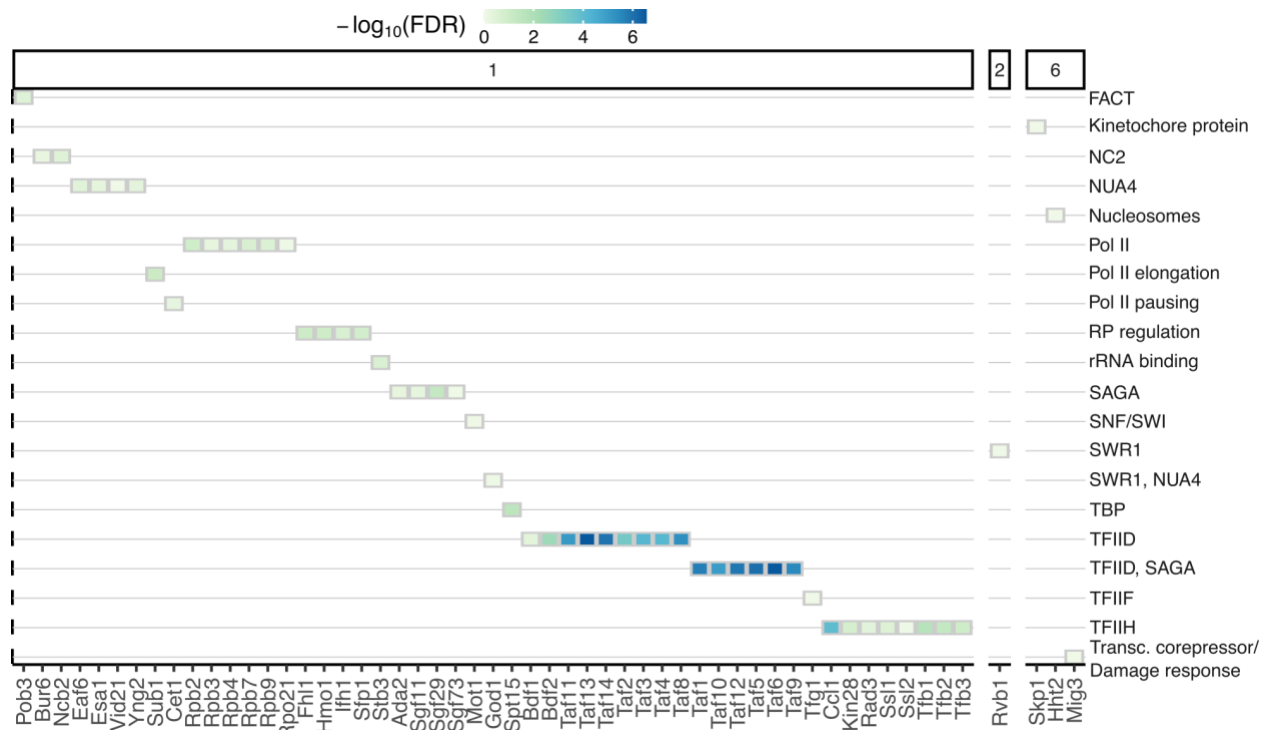

**Appendix Figure S4 - Heatmap clusters enrichment.**

The figure shows the yeast epigenome database transcription factors enriched (Fisher's exact test) in clusters in Fig 4A classified into manually curated functional groups. Compared to Fig 4D, subunits of GTFs and Pol II are included. The numbers on the top of the plot indicate the cluster number from Fig 4A.

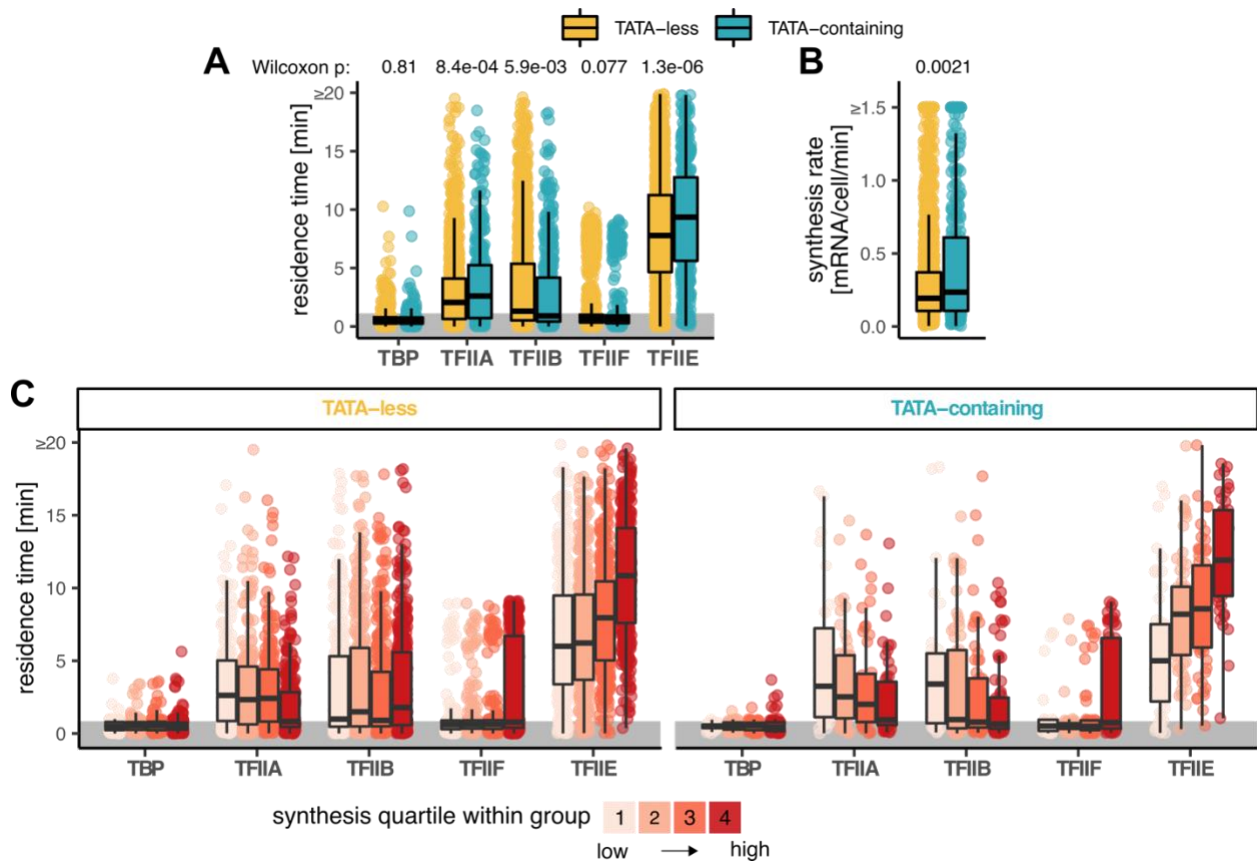

**Appendix Figure S5 - Comparison of residence times between genes with or without a consensus TATA element in their promoters.**

A Box plots showing comparison of residence times (y-axis) for a given GTF (x-axis) for genes without a consensus TATA element in their promoters (labeled TATA-less) and genes with a TATA-containing promoter (Basehoar *et al*, 2004).

B Box plot showing comparison of synthesis rates (y-axis) between genes with TATA-less vs. TATA-containing promoters.

C Box plots showing comparison of residence times (y-axis) for a given GTF (x-axis) across synthesis quartiles within genes with TATA-less (left panel) and TATA-containing (right panel) promoters. In the plots grey area highlights values randomly generated in this study for reliably fast sites.

Data information: (A-C) In box plots the middle line represents the median, the lower and upper hinge represent the first and third quartiles, and the whiskers represent 1.5 \* interquartile range. The  $\geq$  symbol on the y axis indicates that values higher than the indicated value were shrunk to the value shown for plotting purposes in order to eliminate outliers.

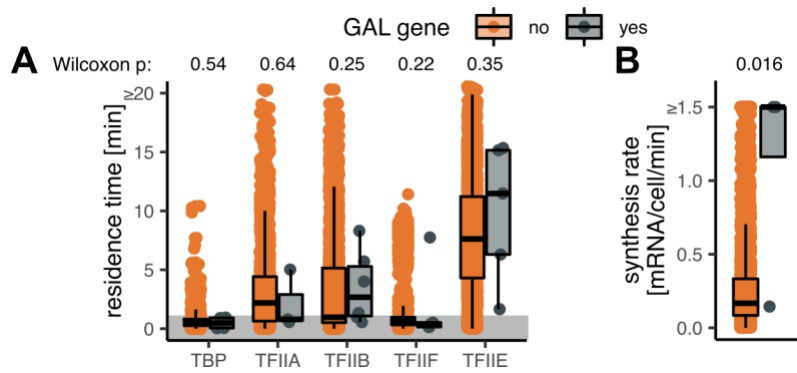

**Appendix Figure S6 - Comparison of residence times between GAL genes and others.**

A Box plots showing comparison of residence times (y-axis) for a given GTF (x-axis) for GAL genes (gray) and all other genes (orange).

B Box plot showing comparison of synthesis rates (y-axis) for GAL genes (gray) versus all other genes.

Data information: (A-B) The middle line in each box plot represents the median, the lower and upper edges of the rectangles represent the boundaries of the first and third quartiles, and the whiskers represent 1.5 \* interquartile range. The  $\geq$  symbols on the y axes indicate that values higher than the indicated value were shrunk for plotting purposes to the value shown to eliminate outliers.

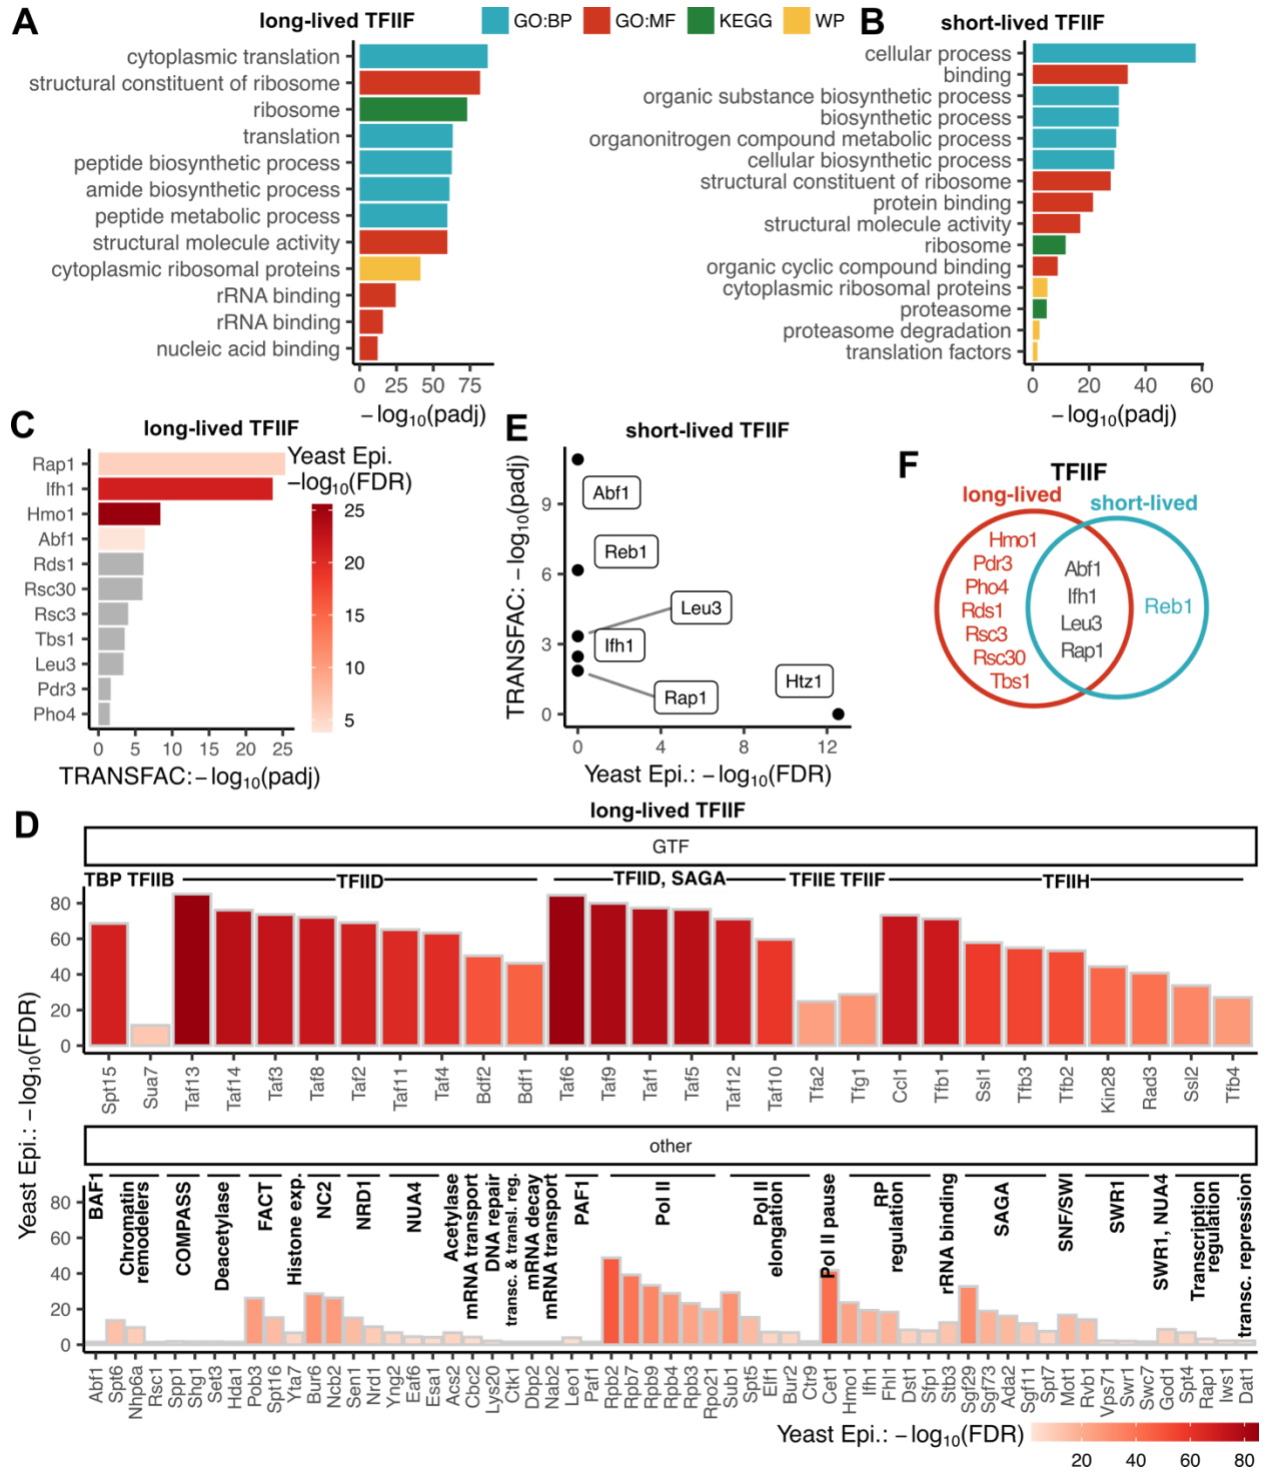

**Appendix Figure S7 - Functional enrichment of long-lived and short-lived TFIIIF sites.**

A,B Pathway enrichment of gene targets of long-lived (A) and short-lived (B) TFIIIF sites.

(C) TRANSFAC enrichment of long-lived TFIIIF gene targets. TF enrichments also identified in Yeast Epigenome database are highlighted in shade of red based on Yeast Epigenome enrichment FDR-corrected p-values.



D Enrichment of long-lived TFIF gene targets in Yeast Epigenome DBF targets. Enriched factors are separated into general transcription factors (GTF) and others and were manually classified into categories. P-values: Fisher's exact test.

E Enrichment of short-lived TFIF gene targets withing Yeast Epigenome database on x-axis vs enrichment within TRANSFAC.

F Venn diagram showing TRANSFAC TFs enriched in long-lived vs. short-lived TFIF sites.

Data information: As TFIF long-lived sites were classified those with residence times  $\geq 5$  minutes, the rest were classified as short-lived. GO:BP GO biological process, GO:MF GO molecular function, WP WikiPatways. Significant enrichment: FDR  $p < 0.05$ . See Material and Methods section "Yeast DBF database (Yeast Epigenome)" for more details on Yeast Epigenome database.

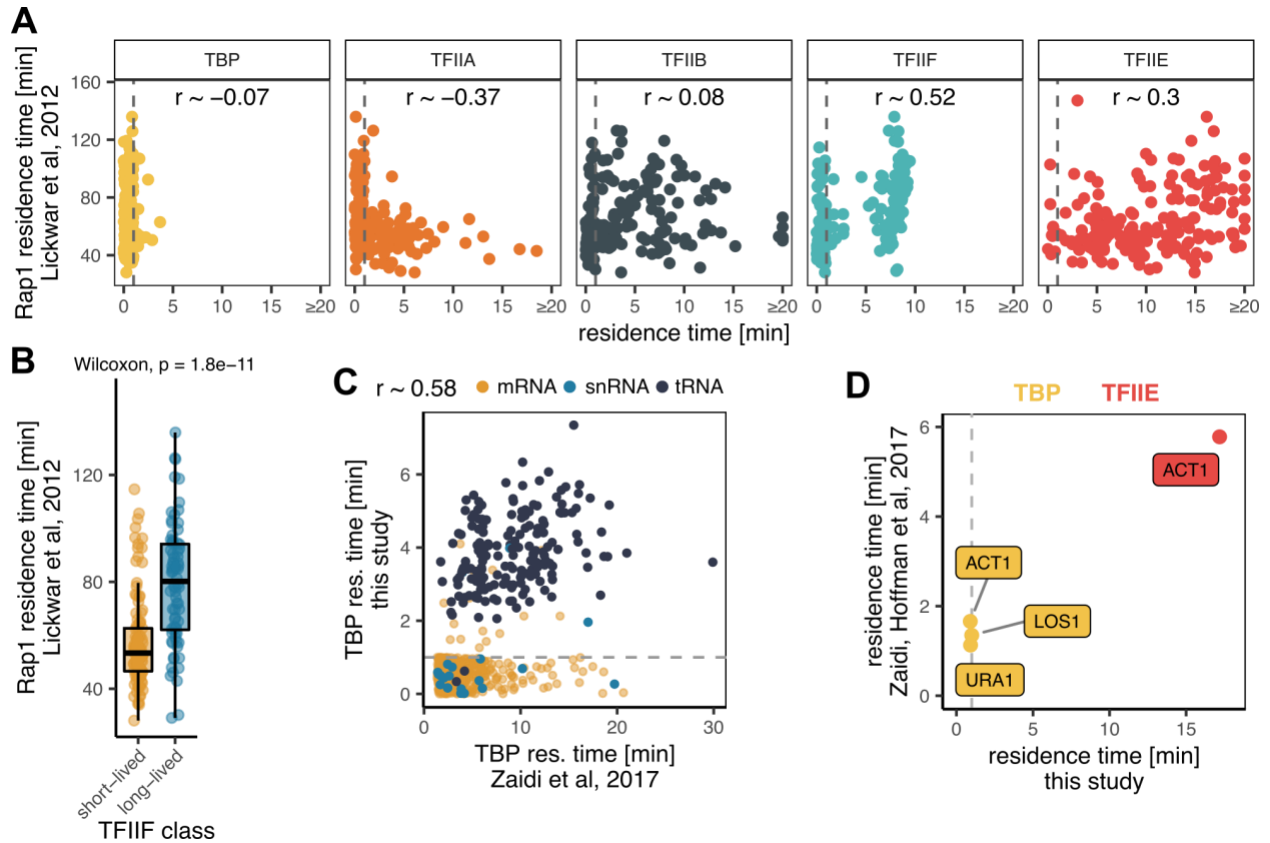

**Appendix Figure S8 - Comparison to Rap1 residence times and comparison of TBP and TFIIIE residence times to others.**

A Comparison between residence times of GTFs from this study (x-axis) to Rap1 residence times from (Lickwar *et al*, 2012). Pearson's correlation coefficient estimates,  $r$ , are indicated in each panel. Grey dashed line separates randomly generated residence time values for reliably fact sites (<1 min).

B Box plots showing the difference in Rap1 residence times at gene targets of short-lived ( $\leq 5$  minutes) vs. long-lived ( $> 5$  minutes) TFIIIF sites.

C Comparison of TBP residence time estimates from this study (y-axis) to those from (Zaidi *et al*, 2017a) (x axis). Pearson's correlation coefficient estimate is indicated above the plot.

D Comparison of TBP and TFIIIE residence time estimates from this study (x-axis) to those from (Zaidi *et al*, 2017b) (y-axis). In the plots grey dashed line separates values randomly generated in this study for reliably fast sites.

Data information: Symbol  $\geq$  on the axis indicates that values higher than an indicated value were shrunk for plotting purposes to eliminate outliers. In the box plots the middle line represents the median, the lower and upper hinge represent the first and third quartiles, and the whiskers represent  $1.5 \times$  interquartile range.

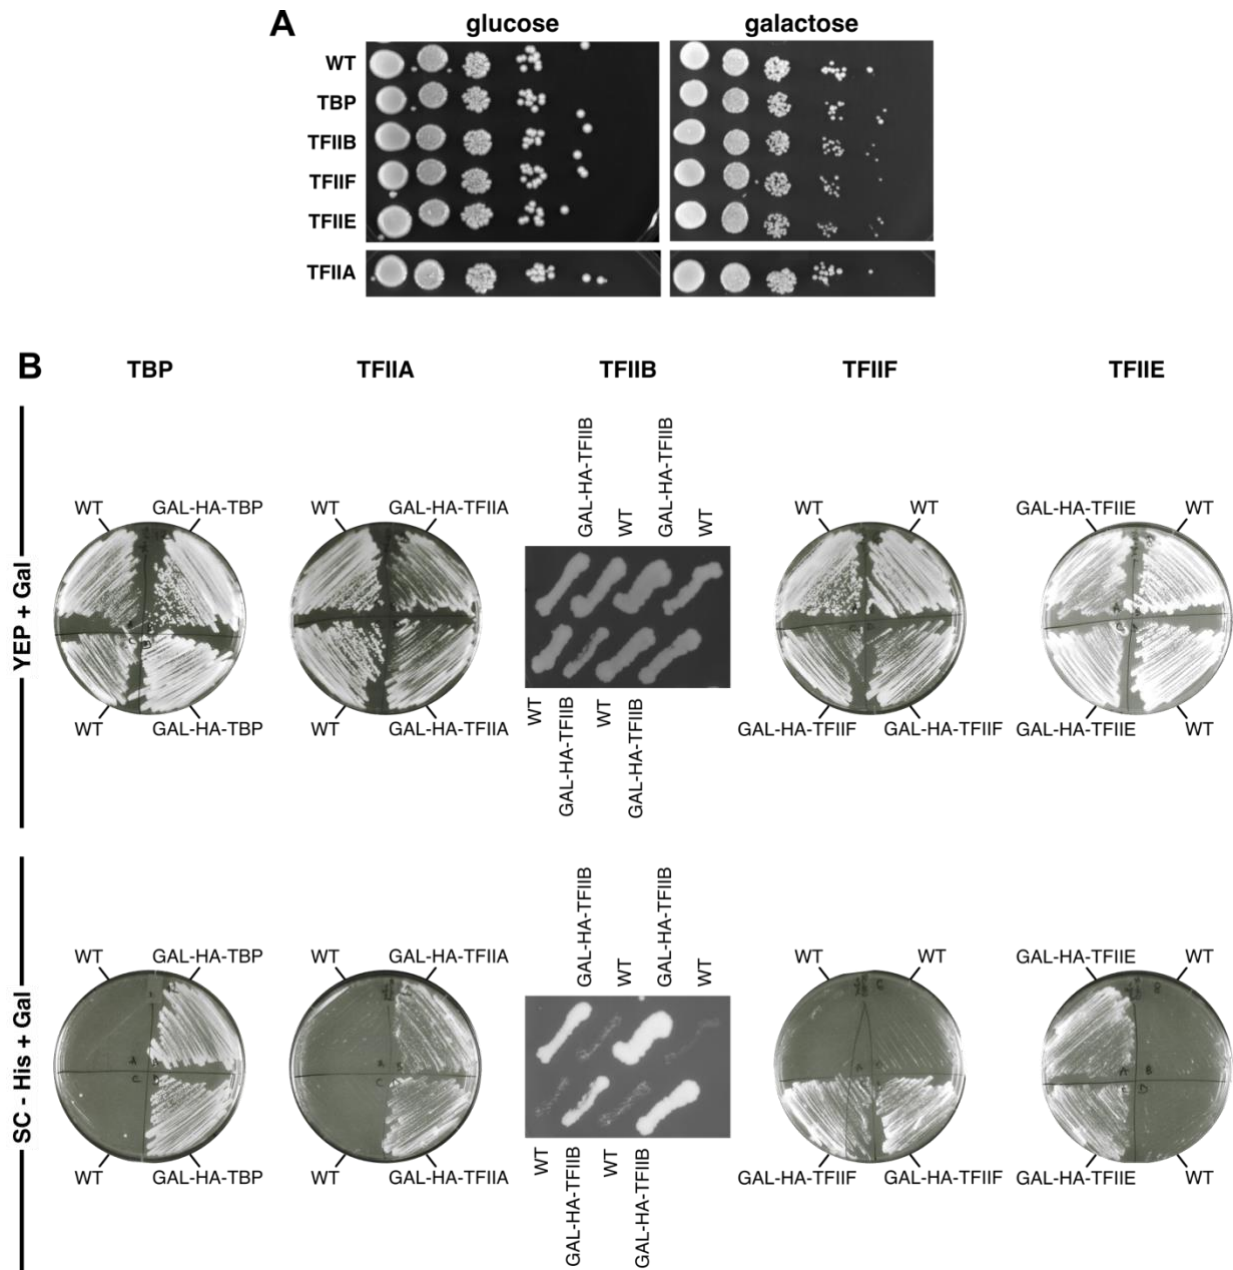

**Appendix Figure S9 - Growth of competition CHIP strains.**

A Ten-fold serial dilutions of diploid yeast strains carrying epitope-tagged versions of the indicated factors. In each GTF competition CHIP strain, one allele of the indicated GTF was tagged with Myc and under control of the native promoter. The other allele was tagged with HA and was under *GAL1* control. Note that for TFIIA, TFIIE, and TFIIF, which contain two subunits, one allele of the other subunit was under control of the native promoter and the other allele was untagged and under *GAL1* control. Please see Materials and Methods for additional details.

B Growth of haploid cells that contain the indicated GTF tagged with HA and under *GAL1* control as indicated. Two isolates of each strain are shown. As in (A), for TFIIA, TFIIE and TFIIF, the other subunit gene for these factors was untagged and under *GAL1* control. Growth on plates without histidine was used to score for cells carrying the HA-tagged alleles.

Data information: WT wildtype cells.

## SUPPLEMENTARY TABLES

Appendix Table S1 - Quantified Western blots: HA/Myc ratios normalized to 0-1.

| target | time [min] | HA/Myc ratio | HA/Myc ratio: sd |
|--------|------------|--------------|------------------|
| TBP    | 0          | 0.000        | 0.000            |
| TBP    | 10         | 0.000        | 0.000            |
| TBP    | 20         | 0.067        | 0.038            |
| TBP    | 25         | 0.188        | 0.004            |
| TBP    | 30         | 0.393        | 0.047            |
| TBP    | 40         | 0.702        | 0.056            |
| TBP    | 60         | 0.935        | 0.085            |
| TBP    | 90         | 1.087        | 0.049            |
| TBP    | 120        | 1.000        | 0.000            |
| TFIIA  | 0          | 0.000        | 0.000            |
| TFIIA  | 10         | 0.000        | 0.000            |
| TFIIA  | 20         | 0.008        | 0.026            |
| TFIIA  | 25         | 0.042        | 0.028            |
| TFIIA  | 30         | 0.135        | 0.025            |
| TFIIA  | 40         | 0.236        | 0.105            |
| TFIIA  | 60         | 0.443        | 0.133            |
| TFIIA  | 90         | 0.909        | 0.115            |
| TFIIA  | 120        | 1.000        | 0.049            |
| TFIIB  | 0          | 0.000        | 0.000            |
| TFIIB  | 10         | 0.006        | 0.004            |
| TFIIB  | 20         | 0.025        | 0.008            |
| TFIIB  | 25         | 0.123        | 0.005            |
| TFIIB  | 30         | 0.234        | 0.092            |
| TFIIB  | 40         | 0.374        | 0.062            |
| TFIIB  | 60         | 0.824        | 0.037            |
| TFIIB  | 90         | 1.036        | 0.096            |
| TFIIB  | 120        | 1.000        | 0.100            |
| TFIIF  | 0          | 0.000        | 0.000            |
| TFIIF  | 10         | 0.004        | 0.006            |
| TFIIF  | 20         | 0.005        | 0.003            |
| TFIIF  | 25         | 0.013        | 0.007            |
| TFIIF  | 30         | 0.053        | 0.091            |
| TFIIF  | 40         | 0.441        | 0.409            |
| TFIIF  | 60         | 0.873        | 0.129            |
| TFIIF  | 90         | 0.978        | 0.219            |
| TFIIF  | 120        | 1.000        | 0.303            |
| TFIIE  | 0          | 0.000        | 0.000            |
| TFIIE  | 10         | 0.004        | 0.009            |
| TFIIE  | 20         | 0.131        | 0.044            |
| TFIIE  | 25         | 0.212        | 0.042            |
| TFIIE  | 30         | 0.308        | 0.043            |
| TFIIE  | 40         | 0.466        | 0.028            |
| TFIIE  | 60         | 0.734        | 0.095            |
| TFIIE  | 90         | 0.965        | 0.016            |
| TFIIE  | 120        | 1.000        | 0.020            |

Appendix Table S2 - List of primers

| GTF   | subunit | target       | forward/<br>reverse | primer 5'-3'                                                                  |
|-------|---------|--------------|---------------------|-------------------------------------------------------------------------------|
| TBP   | -       | HisPGAL1-3HA | F                   | TGGACTATAAGATCGGGGAAAGATAACACATAAAGAAAATAAAACgaattcgcgctcgttttaaac            |
| TBP   | -       | HisPGAL1-3HA | R                   | TCTTGTTTTGCCCTCTTTAAACTCCCTTTAAACGTTCCCTCATCGGCGcactgagcagc gtaaatctg         |
| TBP   | -       | N-Lox-9xMyc  | F                   | TTCTAGTCCAACATAAACAGGTGTATCAAGAGAAAACITTTTTTAAATatgtgcaggtcgacaaacccttaaat    |
| TBP   | -       | N-Lox-9xmyc  | R                   | ACACTATCTTGTTTTGCCCTCTTTAAACTCCCTTTAAACGTTCCCTCATCGGCGcggccgcgcatagggccact    |
| TFIIA | TOA1    | HisPGAL1-3HA | F                   | CAAAATAACAAGGTGGATAAAGCCATACGGCATAATTAATCGgaattcgcgctcgttttaaac               |
| TFIIA | TOA1    | HisPGAL1-3HA | R                   | ACTCTACGATAATCTCGTACACTCTGCTGGCCCTCTGCATTCGAgcactgagcagcgttaactctg            |
| TFIIA | TOA2    | PGAL1-TRP    | F                   | GTATTCGGGGTTAAGCTAATTTTTACTAATAACAATAATTTtagaattcgcgctcgttttaaac              |
| TFIIA | TOA2    | PGAL1-TRP    | R                   | TACTTCTACGATAATAATTCGTAATAATCCCGGGTACTGCCATTTtgagatccggggtttt                 |
| TFIIA | TOA1    | N-Lox-9XMyc  | F                   | CACAAATCAAGGCCATACACAAGGGACATCGTTGGATatgtgcaggtcgacaaacccttaaat               |
| TFIIA | TOA1    | N-Lox-9XMyc  | R                   | AGACTCTACGATAATCTCGTACACTCTGCTGGCCCTCTGCATTCGAgcggccgcgcatagggccact           |
| TFIIB | -       | HisPGAL1-3HA | F                   | AAAGTGAAGAGAAATAATCACTAATAAAGACAACTTAATAGACGgaattcgcgctcgttttaaac             |
| TFIIB | -       | HisPGAL1-3HA | R                   | AGGACCCCTCTTCCCTGCTCTTTTTATCTATGCTCTCCCTAGTgctcctagtcggttttaaac               |
| TFIIB | -       | N-Lox-9xMyc  | F                   | GATCCAGT GATAGAGAAG GGGAGAAGTA GATACGCAGAatgtgcaggtcgacaaacccttaaat           |
| TFIIB | -       | N-Lox-9xmyc  | R                   | AATTAGGACCCCTCTTCCCTGCTCTTTTTATCTATGCTCTCCCTAGTgctcctagtcggttttaaac           |
| TFIIE | TFA1    | HisPGAL1-3HA | F                   | ACGGGAAACATAATGAGAAAATTTTTCTAACITTTTTCTCCCTCGTTAAGgaattcgcgctcgttttaaac       |
| TFIIE | TFA1    | HisPGAL1-3HA | R                   | GAACTTTAAAAGATTTTTTCACAAATCATCTATAGGTCATATCGcactgagcagcgttaactctg             |
| TFIIE | TFA2    | PGAL1-TRP    | F                   | AAGTTCACCTTACGAAATCAGGGCAAAAGAGCTAATAAAGAACTagaattcgcgctcgttttaaac            |
| TFIIE | TFA2    | PGAL1-TRP    | R                   | AGCGTTCAAATTTAGCCAGTAGAGGGTCCCCTGTTTTTACTCATtttgagatccggggtttt                |
| TFIIE | TFA1    | N-Lox-9xMyc  | F                   | ATAGAAAACACTACTGGAAGCAGCTGCTGCAGTGAGTAGAGTatgtgcaggtcgacaaacccttaaat          |
| TFIIE | TFA1    | N-Lox-9xmyc  | R                   | GACGAACCTTTAAAAGATTTTTTCACAAATCATCTATAGGTCATATAGGTCATATCGcggccgcgcatagggccact |
| TFIIF | TFG2    | HisPGAL1-3HA | F                   | TCAAGGCTTGAAAATTAGAAGAATAAGACATAATGCTGTTGGCTTgaattcgcgctcgttttaaac            |
| TFIIF | TFG2    | HisPGAL1-3HA | R                   | GGAAATTAATAGAAAAGTGTGGTGGTCCCTGCTGAACCCACTGCTgcaactgagcagcgttaactctg          |
| TFIIF | TFG1    | PGAL1-TRP    | F                   | TGATAAAAATAAAAATTAATGATAGTAAGAAGTATGGATGGTagaattcgcgctcgttttaaac              |
| TFIIF | TFG1    | PGAL1-TRP    | R                   | GACCTCCCCCGTTTTCTACTGCTGGTGGATTGGCGTCTGGACATtttgagatccggggtttt                |
| TFIIF | TFG2    | N-Lox-9XMyc  | F                   | CAATATTAAGAGTAAAATAAGAAAGACCAACITTAACACCcatgtgcaggtcgacaaacccttaa             |
| TFIIF | TFG2    | N-Lox-9XMyc  | R                   | GGAAATTAATAGAAAAGTGTGGTGGTCCCTGCTGAACCCACTGCTgctcggccgcgcatagggccact          |

**Appendix Table S3 - Hill model fits to HA/Myc Western blot data for turnover model**

| GTF   | XP value | XP standard error | XP t-statistic | XP p-value | t1/2ind value [min] | t1/2ind standard error [min] | t1/2ind t-statistic | t1/2ind p-value | Hill coefficient |
|-------|----------|-------------------|----------------|------------|---------------------|------------------------------|---------------------|-----------------|------------------|
| TBP   | 1.06     | 0.02              | 44.76          | 7.30E-10   | 34.74               | 0.91                         | 38.01               | 2.30E-09        | 4                |
| TFIIA | 1.21     | 0.06              | 20.07          | 1.91E-07   | 67.42               | 3.48                         | 19.35               | 2.46E-07        | 3                |
| TFIIB | 1.62     | 0.04              | 39.19          | 1.83E-09   | 44.25               | 1.32                         | 33.48               | 5.50E-09        | 4                |
| TFIIF | 2.79     | 0.04              | 68.65          | 3.66E-11   | 41.71               | 0.56                         | 73.93               | 2.18E-11        | 7                |
| TFIIE | 1.03     | 0.02              | 46.38          | 5.66E-10   | 41.54               | 1.16                         | 35.69               | 3.52E-09        | 3                |

**Appendix Table S4 - Accurate initial estimates of residence times for turnover model fits:**

$$t_{1/2}^0 [min] = b_0 + b_1(t_{1/2CC} - t_{1/2ind}) + b_2(t_{1/2CC} - t_{1/2ind})^2$$

| GTF    | b0     | b1    | b2    | b0 for (t1/2CC - t1/2ind) ≤ 4 [min] | b1 for (t1/2CC - t1/2ind) > 4 [min] |
|--------|--------|-------|-------|-------------------------------------|-------------------------------------|
| TBP    | 0.082  | 0.608 | 0     |                                     |                                     |
| TFIIA  | 0.201  | 0.607 | 0     |                                     |                                     |
| TFIIB  | 0.454  | 0.575 | 0     |                                     |                                     |
| TFIIF* | 0.205  | 0.238 | 0.164 | 3.61                                | 0.266                               |
| TFIIE  | -0.037 | 0.629 | 0     |                                     |                                     |

\* TFIIF  $t_{1/2}$  vs  $(t_{1/2CC} - t_{1/2ind})$  plots displayed a quadratic relationship for  $(t_{1/2CC} - t_{1/2ind}) \leq 4$  min followed by a linear relationship for  $(t_{1/2CC} - t_{1/2ind}) > 4$  min

## **SUPPLEMENTARY REFERENCES**

Basehoar AD, Zanton SJ & Pugh BF (2004) Identification and Distinct Regulation of Yeast TATA Box-Containing Genes. *Cell* 116: 699–709

García-Martínez J, Aranda A & Pérez-Ortín JE (2004) Genomic Run-On Evaluates Transcription Rates for All Yeast Genes and Identifies Gene Regulatory Mechanisms. *Mol Cell* 15: 303–313

Lickwar CR, Mueller F, Hanlon SE, McNally JG & Lieb JD (2012) Genome-wide protein–DNA binding dynamics suggest a molecular clutch for transcription factor function. *Nature* 2012 484:7393 484: 251–255

Zaidi HA, Auble DT & Bekiranov S (2017a) RNA synthesis is associated with multiple TBP-chromatin binding events. *Scientific Reports* 2017 7:1 7: 1–12

Zaidi HA, Hoffman EA, Shetty SJ, Bekiranov S & Auble DT (2017b) Second-generation method for analysis of chromatin binding with formaldehyde–cross-linking kinetics. *Journal of Biological Chemistry* 292: 19338–19355
